# Supplementary material for: Supercritical Carbon Dioxide and Microwave-Assisted Extraction of Functional Lipophilic Compounds from Arthrospira platensis
Source: PubMed Central journal article supplement (PMC4881484; doi:10.3390/ijms17050658), 2016-05-05
Supplement: ijms-17-00658-s001.pdf [file ijms-17-00658-s001.pdf]

# Supplementary Material: Supercritical Carbon Dioxide and Microwave-Assisted Extraction of Functional Lipophilic Compounds from *Arthrospira platensis*

Diego A. Esquivel-Hernández, Víctor H. López, José Rodríguez-Rodríguez, Gibrán S. Alemán-Nava, Sara P. Cuéllar-Bermúdez, Magdalena Rostro-Alanis and Roberto Parra-Saldívar

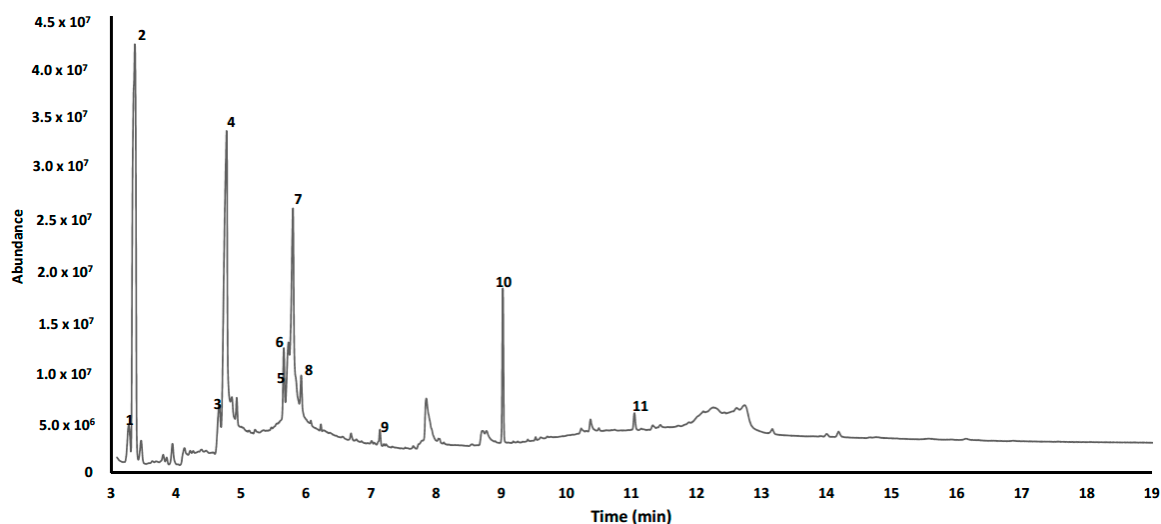

**Figure S1.** GC-MS chromatogram of volatile compounds present in ADF experiment from *A. platensis*. Note: The numbers corresponded to identified peaks\* in Table S1.

**Table S1.** Volatile compounds present in ADF experiment from *A. platensis*.

| Peak * | Rt (min) | Compound                                              | Quality | Area (%) |
|--------|----------|-------------------------------------------------------|---------|----------|
| 1      | 3.277    | 8-Heptadecene                                         | 98      | 2.367    |
| 2      | 3.366    | Heptadecane                                           | 99      | 29.485   |
| 3      | 4.666    | Palmitoleic acid                                      | 99      | 3.474    |
| 4      | 4.778    | n-Hexadecanoic acid                                   | 99      | 23.382   |
| 5      | 5.657    | Phytol                                                | 98      | 2.501    |
| 6      | 5.728    | 1,9-Cyclohexadecadiene                                | 96      | 4.496    |
| 7      | 5.799    | 9,12-Octadecadienoic acid (Z,Z)-                      | 99      | 15.135   |
| 8      | 5.924    | 9,12-Octadecadienoic acid (Z,Z)-                      | 98      | 2.432    |
| 9      | 7.135    | 9,12-Octadecadienoic acid (Z,Z)-                      | 90      | 0.512    |
| 10     | 9.022    | 1,3-Benzenedicarboxylic acid, bis(2-ethylhexyl) ester | 94      | 4.449    |
| 11     | 11.046   | dl- $\alpha$ -Tocopherol                              | 99      | 1.661    |

\* Numbers corresponding to peaks in GC-MS chromatogram presented in Figure S1.
